# Supplementary material
Source: Springer Nature journal article supplement (https://www.springermedizin.de/resource/supplementary/12889_2010_3159_MOESM2_ESM.pdf/9488290)

Regularly registered

Regularly registered + Estimated not regularly registered

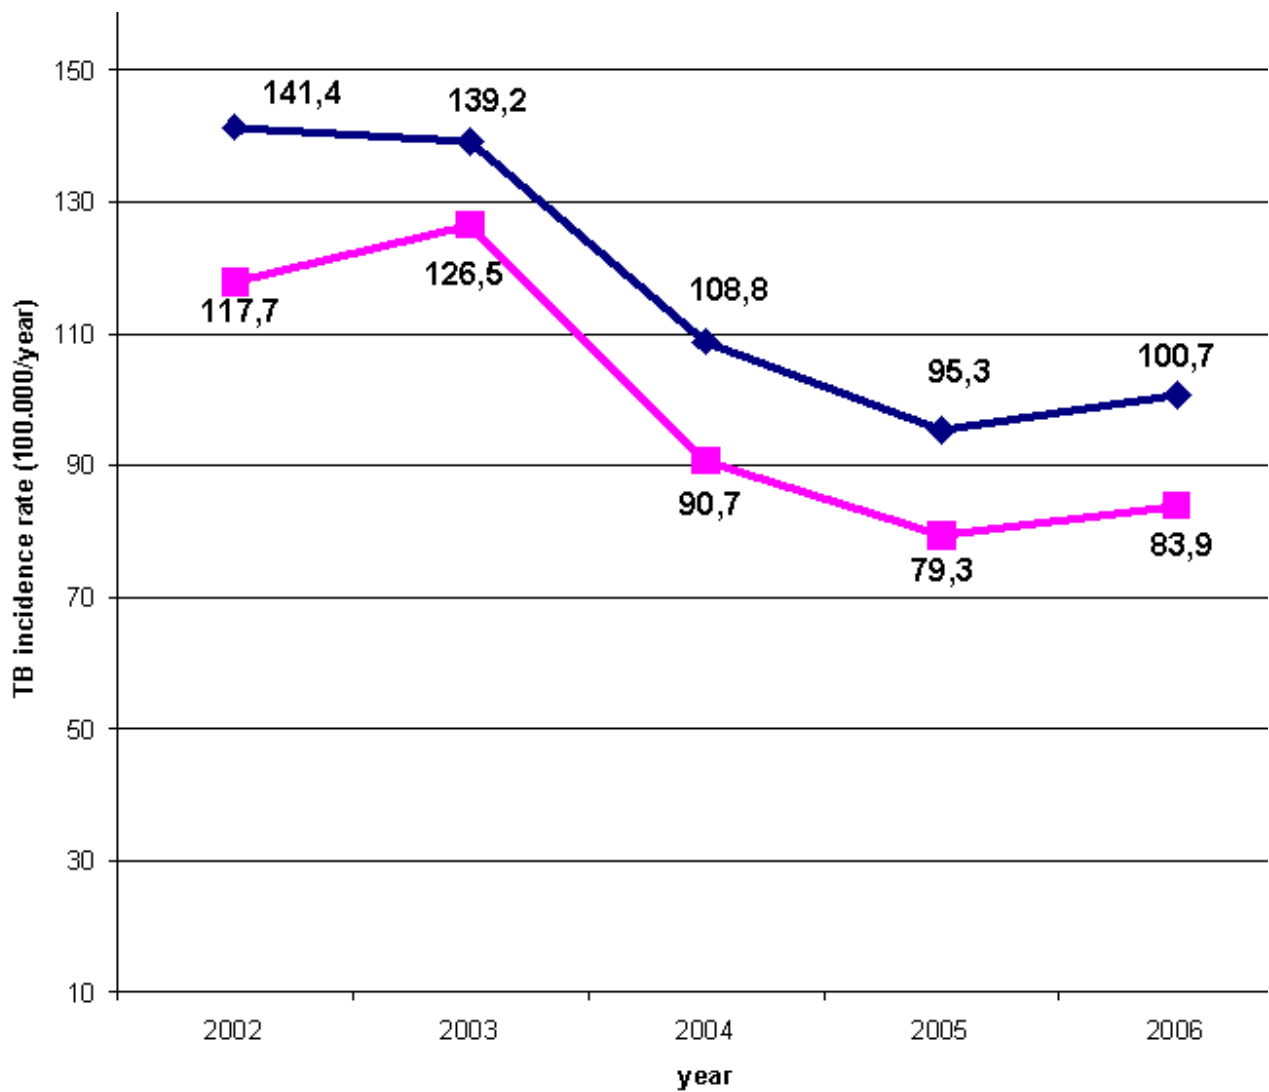

Supplement: MOESM2 [file 9488290]
